# Supplementary material for: Islet α-cell Inflammation Induced By NF-κB inducing kinase (NIK) Leads to Hypoglycemia, Pancreatitis, Growth Retardation, and Postnatal Death in Mice
Source: PubMed Central journal article supplement — Theranostics. 2018 Nov 13;8(21):5960–71. doi: 10.7150/thno.28960 (PMC6299425; doi:10.7150/thno.28960), 2018-11-13
Supplement: thnov08p5960s1.pdf [file thnov08p5960s1.pdf]

**Table S1 Primers for qPCR**

| Genes        | Forward                         | Reverse                        |
|--------------|---------------------------------|--------------------------------|
| TNF $\alpha$ | 5'-CATCTTCTCAAAATTCGAGTGACAA-3' | 5'-TGGGAGTAGACAAGGTACAACCC-3'  |
| CCL2         | 5'-ACTGAAGCCAGCTCTCTTCCTC-3'    | 5'-TTCCTTCTTGGGGTCAGCACAGAC-3' |
| CCL5         | 5'-CCACTTCTTCTCTGGGTTGG-3'      | 5'-GTGCCACGTCAAGGAGTAT-3'      |
| CXCL1        | 5'-GGCGCCTATCGCCAATGA-3'        | 5'-GACTTCGGTTTGGGTGCAGT-3'     |
| CXCL2        | 5'-GAAGACCCTGCCAAGGGTTG-3'      | 5'-AGGCAAACCTTTTGACCGCC-3'     |
| CX3CL1       | 5'-GCAAGTTGAGAAGCGGGTG-3'       | 5'-CTTGGGAAGTCCCATGGTC-3'      |
| CXCL5        | 5'-TGCATTCCGCTTAGCTTCT-3'       | 5'-CAGAAGGAGGTCTGTCTGGA-3'     |
| CXCL10       | 5'-CCAAGTGTGCCGTCAATTT-3'       | 5'-CTCAACACGTGGGCAGGATA-3'     |
| CSF1         | 5'-TGGCTTGGCTTGGGATGATT-3'      | 5'-GTCTGTCCCATGGTTTGGT-3'      |
| iNOS         | 5'-CAGGGCCACCTCTACATTG-3'       | 5'-TGCCCCATAGAAAAGACTG-3'      |
| 36B4         | 5'-AAGCGCTCCTGGCATTGICT-3'      | 5'-CCGAGGGGCAGCAG TGGT-3'      |
| G6pase       | 5'-CCGGTGTITGAACGTCATCT-3'      | 5'-CAATGCCTGACAAGACTCCA-3'     |
| PEPCK        | 5'-ATCATCTTTGGTGGCCGTAG-3'      | 5'-ATCTTGCCCTTGTGTTCTGC-3'     |
| BAFFR        | 5'-CCAGCAAGAGTCCCTGGAAT-3'      | 5'-CTCCACTGTGCTATTGCTCT-3'     |
| CD40         | 5'-TTGTTGACAGCGGTCCATCT-3'      | 5'-GCGAATCTCCCTGTCCACT-3'      |
| LT $\beta$ R | 5'-CAGCTGGTGGCCCTTATC-3'        | 5'-AAGACAACTCGCCTGGGG-3'       |
| RANK         | 5'-CCTTCGACTGGTTCACGTCT-3'      | 5'-GGACACGGGCATAGAGTCAG-3'     |
| NIK          | 5'-TCTCTGGAGGAACAGGAACAA-3'     | 5'-GCCATTGAGAGACTGGATCTG-3'    |

## Figure S1

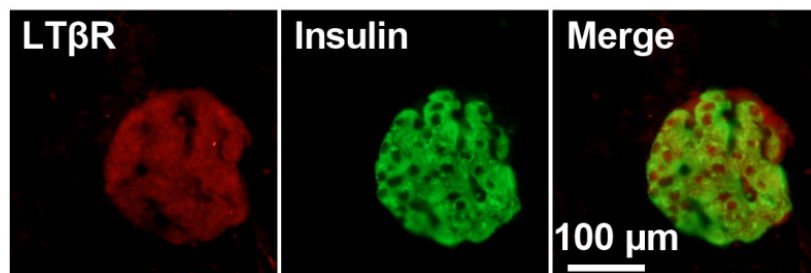

**Figure S1. LT $\beta$ R is present in the insulin-positive cells.** Immunostaining of LT $\beta$ R and insulin in the section of pancreas.

# Figure S2

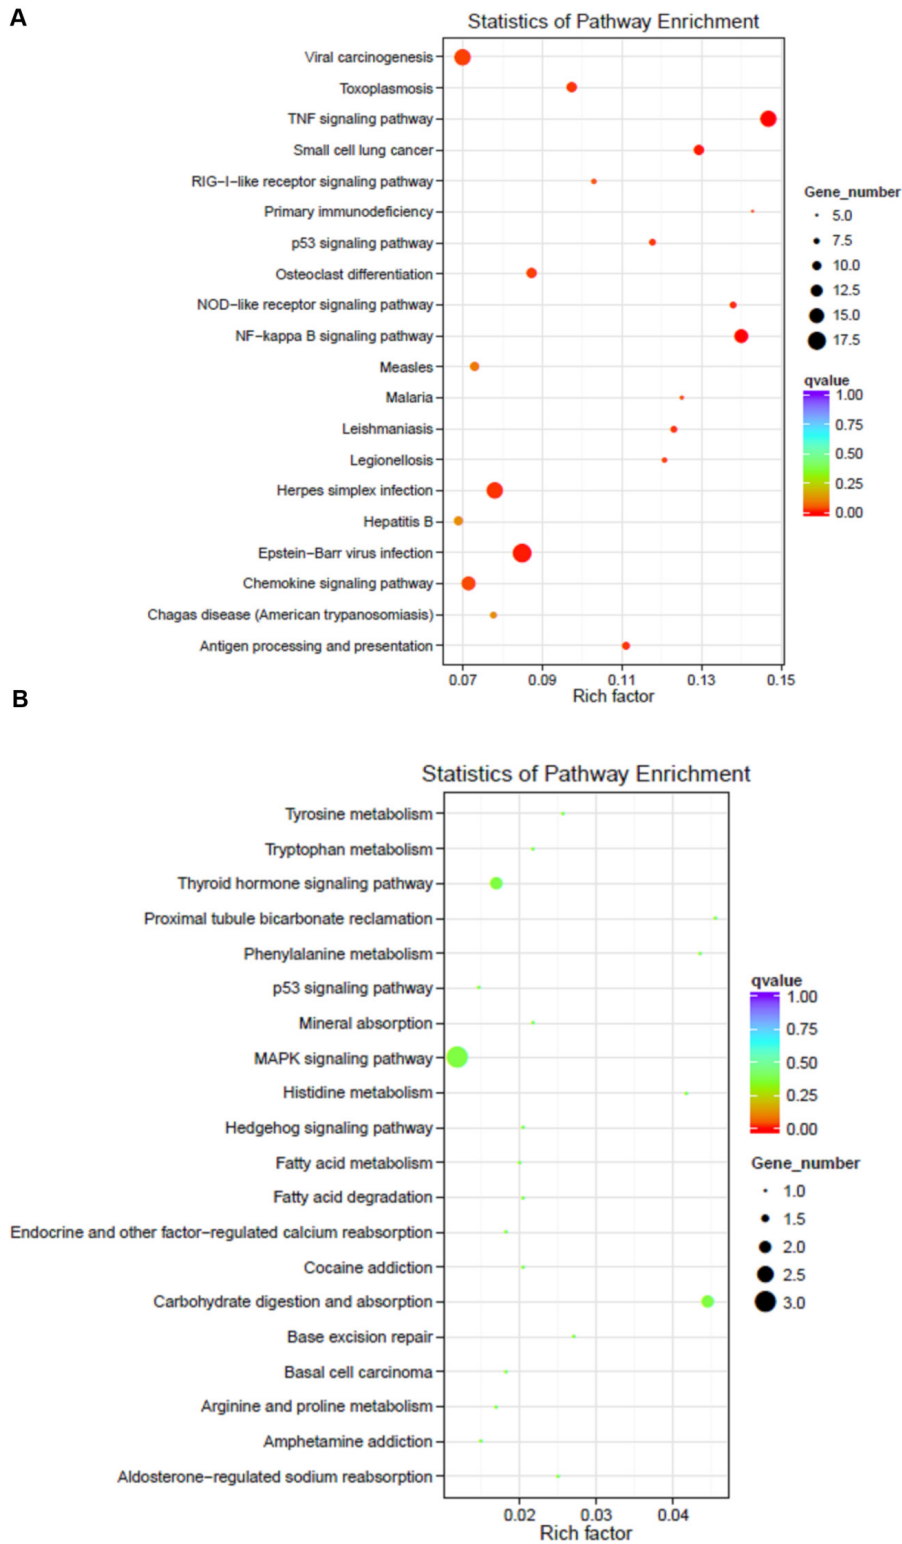

**Figure S2. NIK overexpression activates immune signaling pathways in  $\alpha$ TC1-6 cells.** A-B, KEGG pathway enrichment analysis of up- and down-regulated genes in NIK-overexpressing  $\alpha$ TC1-6 cells compared with  $\beta$ -Gal control.

## Figure S3

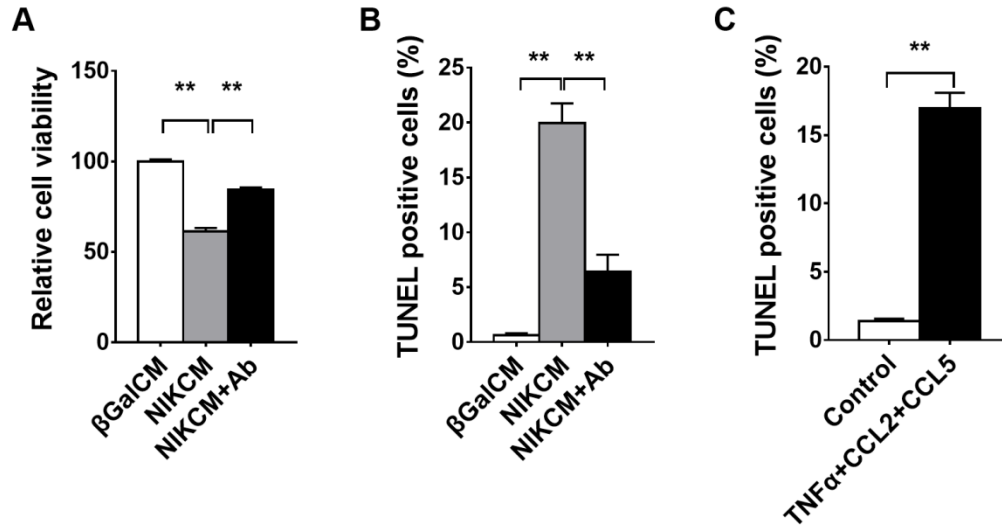

**Figure S3. Conditioned media from NIK overexpressing  $\alpha$ TC1-6 cells induces  $\beta$ -cell death.**

Conditioned media were collected from NIK-overexpressing  $\alpha$ TC1-6 cells (NIKCM) and control cells ( $\beta$ GalCM). Half of NIKCM was neutralized with antibodies against TNF $\alpha$ , CCL2 and CCL5, denoted as NIKCM+Ab. INS-1 832/13 cells were treated with these conditioned media for 16 h. Cell viability was measured by MTT assays (A), and cell apoptosis was measured by TUNEL staining (B). A combination of TNF $\alpha$  (5 ng/mL), CCL2 (100 ng/mL) and CCL5 (100 ng/mL) were used to treat INS-1 832/13 cells for 16 h, and TUNEL positive cells were measured (C) (n = 3-4/group). \*\*, p < 0.01.

## Figure S4

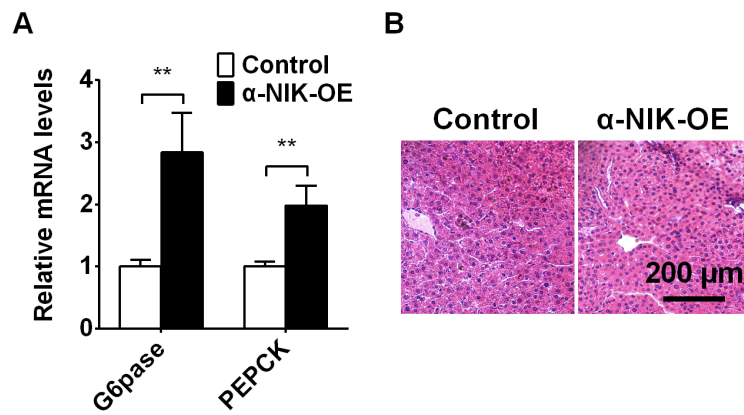

**Figure S4.  $\alpha$ -NIK-OE mice display high expression levels of *G6pase* and *PEPCK* and normal structure in the liver as compared to those in control mice. A, *G6pase* and *PEPCK* mRNA levels were measured by RT-qPCR assays (n = 10-11/group). B, H&E staining. \*\*, p < 0.01.**

## Figure S5

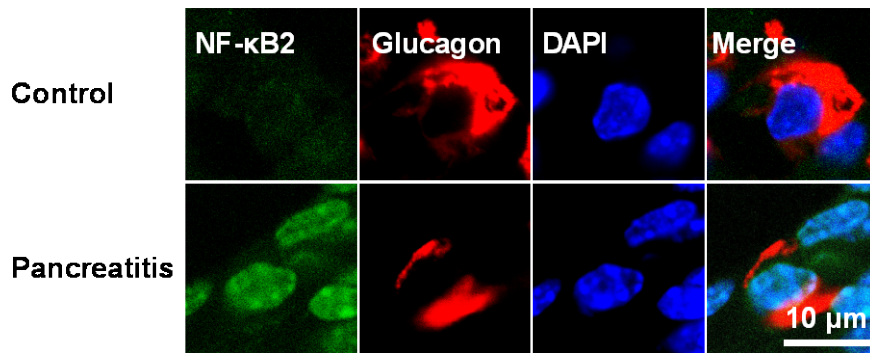

**Figure S5. Nuclear NF-κB2 is increased in pancreatic islet  $\alpha$  cells in acute pancreatitis mouse model.** Pancreatic cryosections of cerulein-induced acute pancreatitis were coimmunostained with NF-κB2 and glucagon.

## Figure S6.

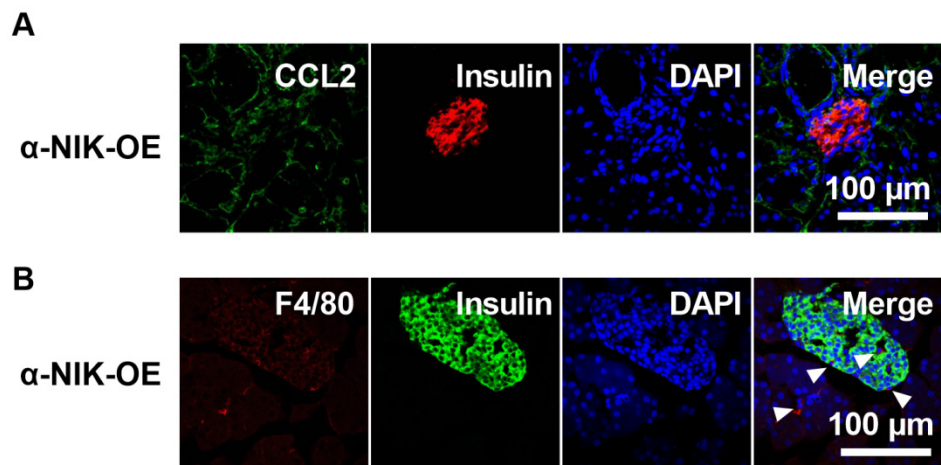

**Figure S6.  $\alpha$ -NIK-OE mice display insulinitis.** Pancreatic cryosections of  $\alpha$ -NIK-OE mice were co-immunostained with CCL2 and insulin (A) or F4/80 and insulin (B).

**Figure S7**

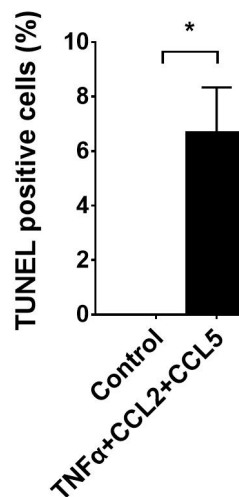

**Figure S7. Cytokine and chemokine induce acinar cell death.** Primary pancreatic acinar cells were isolated from C57BL/6 mice, and then treated with or without a combination of TNF $\alpha$  (5 ng/mL), CCL2 (100 ng/mL) and CCL5 (100 ng/mL) for 16 hours. TUNEL positive cells were measured (n = 3/group). \*, p < 0.05.

**Figure S8**

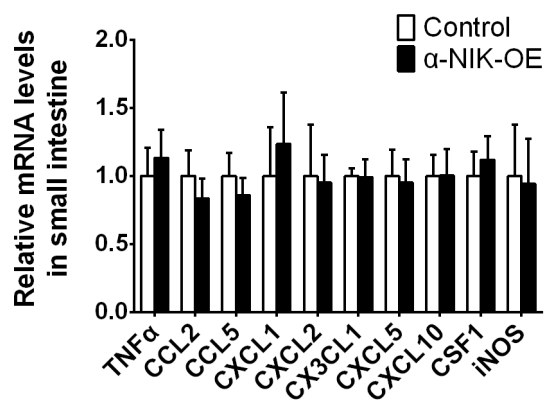

**Figure S8.  $\alpha$ -NIK-OE and control mice display similar expression of inflammatory genes in small intestine.** The expression levels of inflammatory genes in small intestine were measured by RT-qPCR assay (n = 9-11/group).
